# Supplementary material
Source: MDPI journal article supplement (https://www.mdpi.com/1873-149X/30/2/20)
Supplement: s1 [file s1]

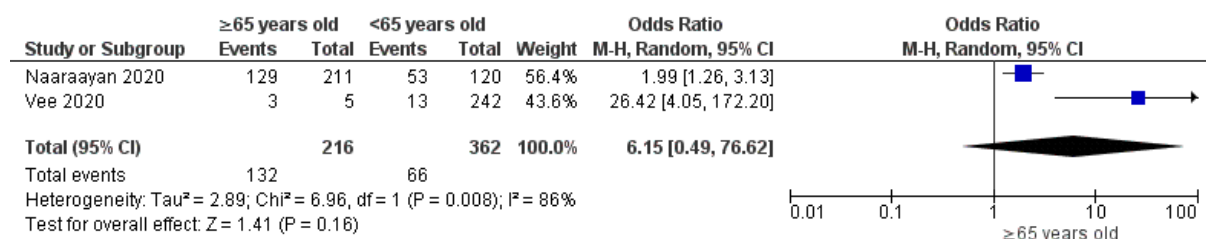

(a)

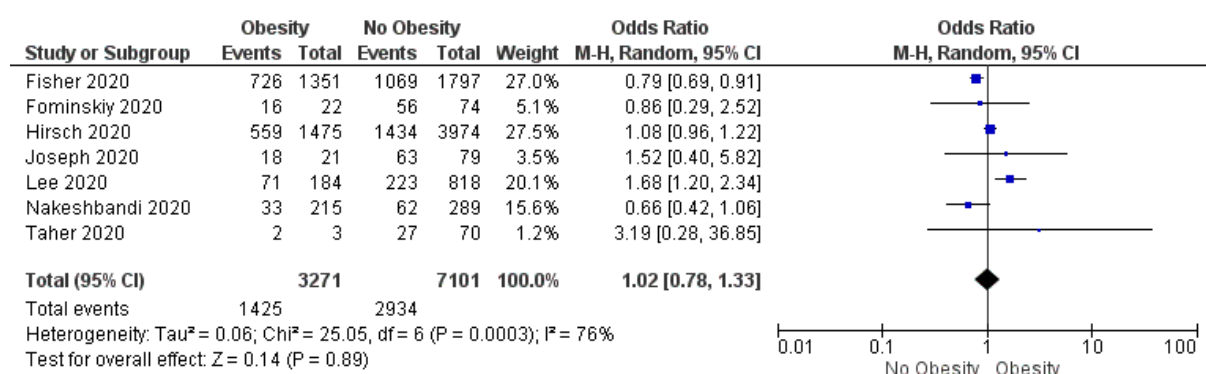

(b)

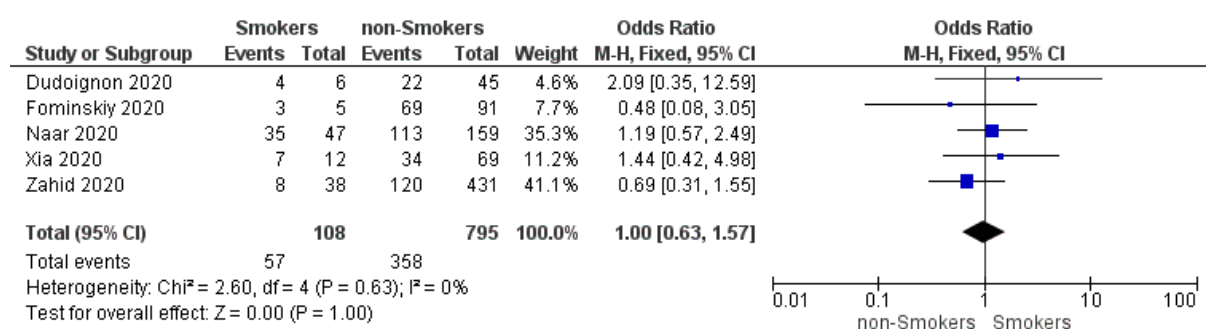

(c)

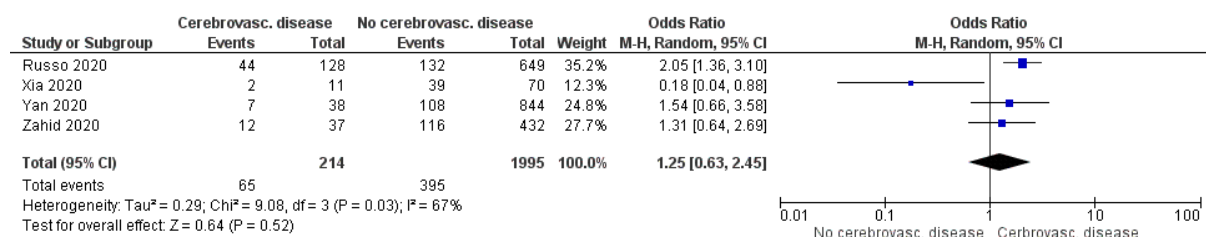

(d)

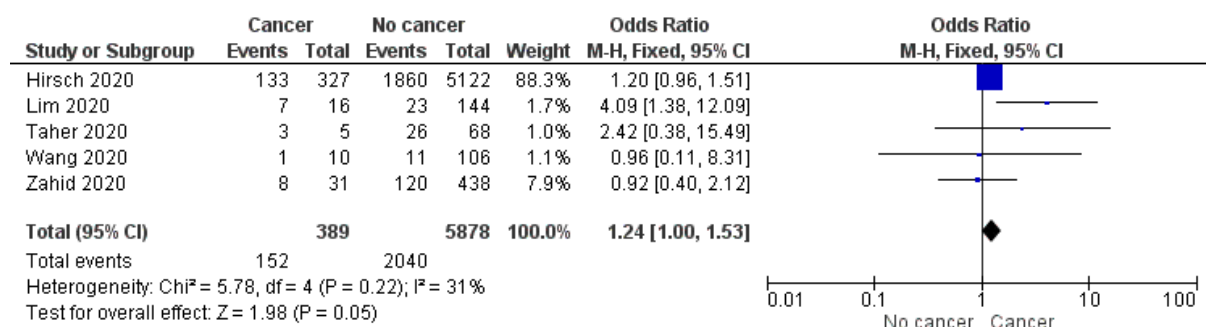

(e)

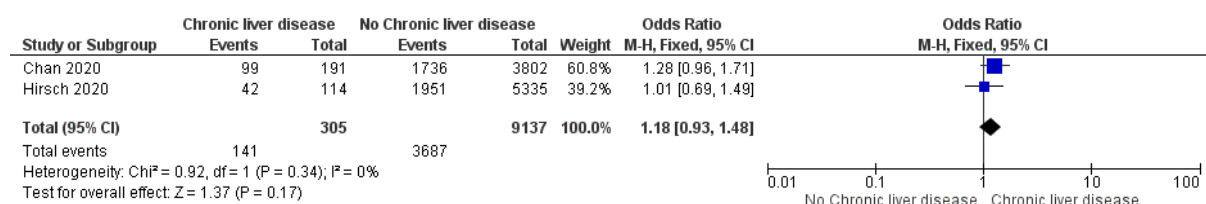

(f)

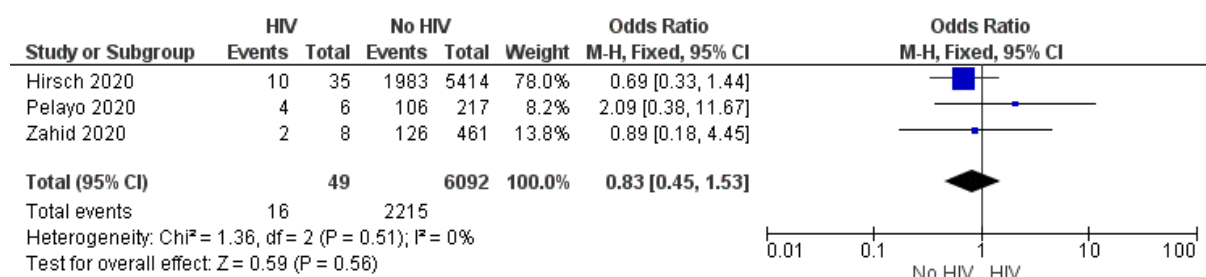

(g)

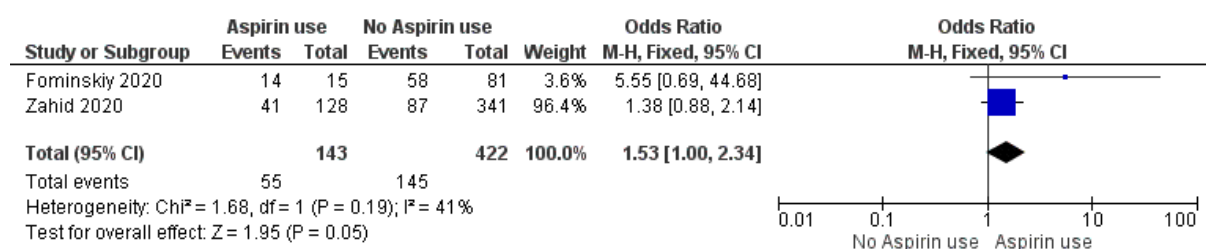

(h)

**Figure S1.** Forrest plot showing association between risk of AKI in COVID-19 patients with advanced age (a), obesity (b), smokers (c), cerebrovascular disease (d), cancer (e), chronic liver disease (f), HIV (g), and chronic use of aspirin (h). [11,14-16,18,20,21,23,26,28,30,31,33-35,37-39]
